# Supplementary figures and images for: How have changes in death by cause and age group contributed to the recent stalling of life expectancy gains in Scotland? Comparative decomposition analysis of mortality data, 2000–2002 to 2015–2017
Source: PubMed Central journal article supplement — BMJ Open. 2020 Oct 7;10(10):e036529. doi: 10.1136/bmjopen-2019-036529 (PMC7542937; doi:10.1136/bmjopen-2019-036529), 2020-10-07

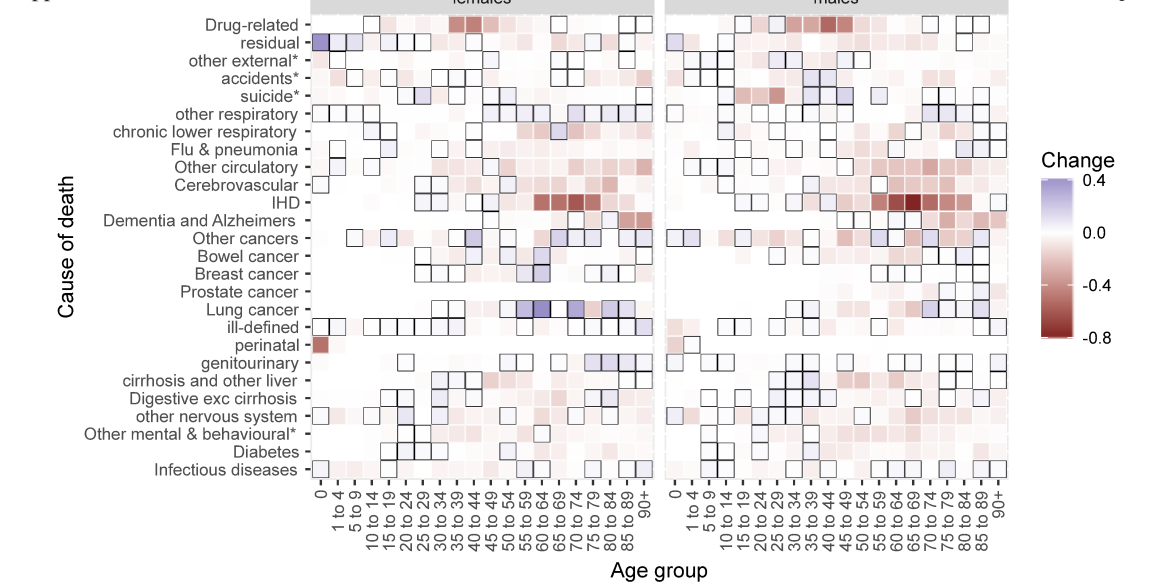

Supplement: bmjopen-2019-036529supp003.pdf [file bmjopen-2019-036529supp003.pdf]
